# Supplementary material for: Reference gene selection for transcriptional profiling in Cryptocercus punctulatus, an evolutionary link between Isoptera and Blattodea
Source: PubMed Central journal article supplement (PMC7746730; doi:10.1038/s41598-020-79030-6), 2020-12-17
Supplement: 41598_2020_79030_MOESM1_ESM.pdf [file 41598_2020_79030_MOESM1_ESM.pdf]

## Supplementary Materials

---

### **Reference gene selection for transcriptional profiling in *Cryptocercus punctulatus*, an evolutionary link between Isoptera and Blattodea**

Zhen Li<sup>1,2,#</sup>, Xiangrui Li<sup>2,3,#</sup>, Qingwen Zhang<sup>1</sup>, Ling Yuan<sup>4</sup>, Xuguo Zhou<sup>2,\*</sup>

<sup>1</sup> *Department of Entomology and MOA Key Lab of Pest Monitoring and Green Management, China Agricultural University, Beijing, China*

<sup>2</sup> *Department of Entomology, University of Kentucky, Lexington, KY 40546-0091, USA*

<sup>3</sup> *State Key Laboratory for Biology of Plant Diseases and Insect Pests, Institute of Plant Protection, Chinese Academy of Agricultural Sciences, Beijing, China*

<sup>4</sup> *Department of Plant and Soil Sciences, KTRDC, University of Kentucky, KY 40546, USA*

#These authors contribute equally.

---

\* Corresponding Author:

Dr. Xuguo "Joe" Zhou

Department of Entomology

University of Kentucky

S-225 Agricultural Science Center North

Lexington, KY 40546-0091

Phone: 859-257-3125

Fax: 859-323-1120

Email: xuguo Zhou@uky.edu

**Table S1 Primers used for RT-qPCR analysis**

| Gene                            | Forward primer             | Reverse primer           | Amplicon (bp) | R <sup>2</sup> * | E (%) <sup>§</sup> |
|---------------------------------|----------------------------|--------------------------|---------------|------------------|--------------------|
| <i>Candidate reference gene</i> |                            |                          |               |                  |                    |
| <i>Actin</i>                    | AACAAGGAGCCTCAATTCATCATC   | ACCAGTAGCATCAAAGCCTCATC  | 144           | 0.9973           | 105.2              |
| <i>EF1a</i>                     | CGGTCGCATTTCTCCTTGATTTTC   | TGGTTATGTGGCTGGCGACTC    | 180           | 0.9997           | 98.7               |
| <i>GADPH</i>                    | GCGCAGCCCAGAACATTATCC      | GCCGACTTGCCCAACCTGAC     | 158           | 0.9997           | 101.2              |
| <i>HSP60</i>                    | GCTCAACGGAAACCATTAGTCATC   | AAAACCAGGGGCCTTCACAG     | 122           | 0.9998           | 97.2               |
| <i>HSP70</i>                    | GCGTTCTCCATGACCCTTCTTATC   | TTCCTGCCTACTTCAACGATTCC  | 146           | 0.9997           | 99.0               |
| <i>αTUB</i>                     | TGGGGATGTAGTACCGAAAGATG    | GTAGGGGGCTGGTAGTTGATGC   | 124           | 0.9998           | 97.9               |
| <i>UBC</i>                      | TCCTGCGGTTCAATGAGTAGTATC   | CAGTTTTCCAATTGCCAGGTG    | 131           | 0.9972           | 94.7               |
| <i>RPS18</i>                    | TGCATATCGGCGACCAACTC       | GTGCTGATCTGCTAAAGGAAAATG | 144           | 0.9998           | 94.1               |
| <i>ATPase</i>                   | CCAGCCCGAAGACAAAAC         | GCCAGCCACAGGTAGAAGATG    | 135           | 0.9994           | 94.3               |
| <i>GST</i>                      | GCCAGGCAGGTAGTAGAAATCAATAG | TACGGGTGGAAGTTGTCAGAAG   | 122           | 0.9902           | 109.3              |
| <i>Target gene</i>              |                            |                          |               |                  |                    |
| <i>Hex-1</i>                    | ACGTGGCTCCTGTCAATGTAG      | CGCAAATCCCACGACTCC       | 121           | 0.9998           | 98.9               |
| <i>Cell-1</i>                   | GGGATTGGCGCTGTTGTAG        | CACCCACTCATCCGCATC       | 94            | 0.9996           | 96.6               |

\*: Linear regression coefficient for the reproducibility of qRT-PCR analysis.

§: Amplification efficiency calculated by the equation  $E=10^{(-1/\text{slope})}$ .

**Table S2 Functions of candidate reference and target genes**

| <b>Gene</b>                     | <b>Full Name</b>                                | <b>Function</b>                                                                                                                                                           |
|---------------------------------|-------------------------------------------------|---------------------------------------------------------------------------------------------------------------------------------------------------------------------------|
| <b>Candidate reference gene</b> |                                                 |                                                                                                                                                                           |
| <b>Actin</b>                    | <i>actin</i>                                    | cytoskeletal structural protein                                                                                                                                           |
| <b>EF1<math>\alpha</math></b>   | <i>elongation factor-1<math>\alpha</math></i>   | catalysation of GTP-dependent binding of aminoacyl-tRNA to the ribosome; translational factor                                                                             |
| <b>GAPDH</b>                    | <i>glyceraldehyde 3 phosphate dehydrogenase</i> | oxidoreductase in glycolysis and gluconeogenesis                                                                                                                          |
| <b>HSP60</b>                    | <i>heat shock protein 60</i>                    | preventing damage to proteins in response to high levels of heat; chaperonin to assist folding linear amino acid chains into their respective three-dimensional structure |
| <b>HSP70</b>                    | <i>heat shock protein 70</i>                    | preventing damage to proteins in response to high levels of heat                                                                                                          |
| <b><math>\alpha</math>TUB</b>   | <i><math>\alpha</math>-tubulin</i>              | cytoskeletal structural protein                                                                                                                                           |
| <b>UBC</b>                      | <i>ubiquitin conjugating enzyme</i>             | protein degradation                                                                                                                                                       |
| <b>RPS18</b>                    | <i>ribosomal protein S18</i>                    | component of the 40S ribosome                                                                                                                                             |
| <b>ATPase</b>                   | <i>ATPase</i>                                   | catalyze the decomposition of adenosine triphosphate (ATP) into adenosine diphosphate (ADP)                                                                               |
| <b>GST</b>                      | <i>glutathione-S-transferase</i>                | antioxidative enzyme                                                                                                                                                      |
| <b>Target gene</b>              |                                                 |                                                                                                                                                                           |
| <b>Hex-1</b>                    | <i>hexamerin 1</i>                              | Multifunctional insect storage proteins utilized during metamorphosis                                                                                                     |
| <b>Cell-1</b>                   | <i>cellulase 1</i>                              | catalyze cellulolysis                                                                                                                                                     |

**Table S3. Expression profiles of candidate and target genes across developmental stages**

| Gene                            | 1 <sup>st</sup> Nymph* | 2 <sup>nd</sup> Nymph | Female        | Male         |
|---------------------------------|------------------------|-----------------------|---------------|--------------|
| <i>Candidate reference gene</i> |                        |                       |               |              |
| <i>ACT</i>                      | 1.11±0.06 b            | 2.53±0.290 a          | 2.99±0.096 a  | 2.59±0.047 a |
| <i>EF1α</i>                     | 1.05±0.290 a           | 1.67±0.024 c          | 3.13±0.076 a  | 2.14±0.058 b |
| <i>GAPDH</i>                    | 1.02±0.017 d           | 2.04±0.035 b          | 2.50±0.047 a  | 1.77±0.025 c |
| <i>HSP60</i>                    | 1.10±0.051 b           | 3.08±0.131 a          | 3.28±0.119 a  | 1.46±0.308 b |
| <i>HSP70</i>                    | 1.03±0.02 c            | 2.19±0.051 b          | 2.80±0.051 a  | 2.10±0.044 c |
| <i>αTUB</i>                     | 1.01±0.008 c           | 2.23±0.058 a          | 2.30±0.042 a  | 1.86±0.041 b |
| <i>UbC</i>                      | 1.02±0.017 c           | 1.91±0.057 ab         | 1.70±0.052 b  | 2.08±0.096 a |
| <i>RPS18</i>                    | 4.97±2.008 b           | 8.76±0.301 ab         | 10.22±0.515 a | 11.14±0.30 a |
| <i>ATPase</i>                   | 1.03±0.020 b           | 1.65±0.198 a          | 1.41±0.012 ab | 1.53±0.067 a |
| <i>GST</i>                      | 1.25±0.124 c           | 4.17±0.044 a          | 1.58±0.084 bc | 1.77±0.027 b |
| <i>Target gene</i>              |                        |                       |               |              |
| <i>Hex-1</i>                    | 1.13±0.078 c           | 2.36±0.10 b           | 4.43±0.319 a  | 1.11±0.067 c |
| <i>Cell-1</i>                   | 1.32±0.090 a           | 1.67±0.094 a          | 3.27±0.553 b  | 1.09±0.067 a |

“\*”\*: Developmental stages included the 1<sup>st</sup> nymph, 2<sup>nd</sup> nymph, adult female and male. Different letters following the relative expression level denote significance.

**Table S4. Expression profiles of candidate and target genes across various tissues**

| Gene                            | NG*                     | SG                            | FG                        | MG                    | HG                    | FB                      | FR                       | MR                   | Mus              | Ant               | Leg                 |
|---------------------------------|-------------------------|-------------------------------|---------------------------|-----------------------|-----------------------|-------------------------|--------------------------|----------------------|------------------|-------------------|---------------------|
| <i>Candidate reference gene</i> |                         |                               |                           |                       |                       |                         |                          |                      |                  |                   |                     |
| <i>ACT</i>                      | 144.23±11.08<br>0 bc    | 191.04±5.130<br>b             | 89.41±10.513<br>cd        | 145.08±22.1<br>90 bc  | 280.79±26.<br>603 a   | 78.75±3.329<br>de       | 91.30±5.812<br>cd        | 58.63±5.5<br>72 def  | 1.47±0.<br>154 f | 1.24±0.1<br>88 f  | 27.37±0.7<br>14 e   |
| <i>EF1α</i>                     | 80.13±6.740<br>bc       | 280.71±12.48<br>0 a           | 115.07±9.681<br>b         | 143.67±22.7<br>04 bc  | 308.08±25.<br>744 a   | 121.54±9.53<br>4 b      | 245.06±16.67<br>5 a      | 124.72±11<br>.386 b  | 1.15±0.<br>099 d | 1.80±0.1<br>63 d  | 46.34±3.8<br>98 cd  |
| <i>GAPDH</i>                    | 95.40±6.072<br>b        | 50.22±0.691 c                 | 45.10±2.615<br>cd         | 59.14±9.854           | 127.87±7.5<br>20 a    | 44.08±1.713<br>c        | 34.44±2.192<br>cd        | 12.80±0.1<br>40 de   | 1.38±0.<br>112 e | 1.07±0.0<br>39 e  | 39.39±1.8<br>09 c   |
| <i>HSP60</i>                    | 1267.28±107.<br>151 bc  | 1462.75±40.9<br>62 b          | 831.93±72.04<br>1 cd      | 1305.79±20<br>8.370   | 2270.53±20<br>1.692 a | 1212.96±65.<br>663 bc   | 1318.98±214.<br>021 bc   | 364.43±33<br>.137 de | 1.70±0.<br>348 e | 1.64±0.1<br>49 e  | 89.15±2.8<br>63 e   |
| <i>HSP70</i>                    | 192.99±38.30<br>6 c     | 411.23±21.29<br>7 a           | 96.958±6.306<br>d         | 129.43±20.7<br>75 cd  | 288.37±32.<br>871 b   | 210.58±6.91<br>8 bc     | 215.81±15.22<br>3 bc     | 88.32±7.7<br>0 de    | 1.35±0.<br>181 e | 1.59±0.1<br>55 e  | 36.61±2.5<br>42 de  |
| <i>αTUB</i>                     | 130.83±7.521<br>cd      | 189.38±6.669<br>bc            | 173.01±13.22<br>7 c       | 289.59±54.7<br>60 b   | 439.86±42.<br>662 a   | 164.31±8.20<br>0 c      | 105.55±8.077<br>cde      | 50.81±7.1<br>03 de   | 1.06±0.<br>044 e | 1.71±0.1<br>75 e  | 29.11±1.4<br>26 de  |
| <i>UbC</i>                      | 171.83±13.19<br>1 a     | 120.01±1.947<br>b             | 61.71±4.501<br>cd         | 89.36±11.80<br>6 bc   | 208.10±20.<br>818 a   | 47.64±4.001<br>cd       | 59.87±3.030<br>cd        | 19.35±1.6<br>63 de   | 1.03±0.<br>044 e | 1.26±0.1<br>56 e  | 25.38±2.0<br>16 de  |
| <i>RPS18</i>                    | 33.11±1.446<br>d        | 83.33±1.866 a                 | 50.86±4.486<br>bcd        | 79.56±13.88<br>4 ab   | 65.59±7.16<br>4 abc   | 22.47±1.455<br>de       | 76.74±9.778<br>ab        | 38.91±5.4<br>53 cd   | 1.14±0.<br>087 e | 1.71±0.1<br>90 e  | 22.25±1.6<br>86 de  |
| <i>ATPase</i>                   | 14.56±2.015<br>e        | 979.26±60.43<br>5 a           | 98.39±11.875<br>bcde      | 157.90±21.3<br>47 b   | 136.64±15.<br>402 bc  | 36.57±2.415<br>de       | 56.27±1.487<br>bcd       | 36.02±3.0<br>77 cd   | 1.06±0.<br>032 e | 3.16±0.4<br>39 e  | 33.16±2.4<br>98 e   |
| <i>GST</i>                      | 28.72±0.519<br>bc       | 23.33±0.593<br>bc             | 21.00±1.970 c             | 32.63±5.587<br>b      | 66.65±4.02<br>0 a     | 5.86±0.449 e            | 4.18±0.213 e             | 7.35±0.76<br>de      | 1.34±0.<br>192 e | 1.89±0.0<br>36 e  | 17.68±0.4<br>35 cd  |
| <i>Target gene</i>              |                         |                               |                           |                       |                       |                         |                          |                      |                  |                   |                     |
| <i>Hex-1</i>                    | 38758.52±41<br>35.625 b | 419.63±60.15<br>6 c           | 51.24±6.699 c             | 2256.67±21<br>6.799 c | 108.81±9.8<br>99 c    | 32167.95±21<br>74.610 b | 142707.36±9<br>115.863 a | 849.45±12<br>7.910 c | 1.34±0.<br>188 c | 2.38±0.1<br>90 c  | 384.67±2<br>0.807 c |
| <i>Cell-1</i>                   | 196.57±27.09<br>9 b     | 15891390.95±<br>1391797.460 a | 213668.99±18<br>594.514 b | 32.21±3.414<br>b      | 189.25±13.<br>872     | 871.69±48.1<br>20 b     | 66.47±2.014 b            | 34.69±3.3<br>63 b    | 1.09±0.<br>058 b | 42.27±1.<br>437 b | 57.42±2.8<br>14 b   |

“\*”: Tissues were dissected from *C. punctulatus* adults, and they included leg (Leg), antenna (Ant), muscle (Mus), neuron ganglion (NG), salivary gland (SG), foregut (FG), midgut (MG), hindgut (HG), fatbody (FB), ovary (FR), and testis (MR). Different letters following the relative expression level denote significance.
